# Supplementary material
Source: MDPI journal article supplement (https://www.mdpi.com/1999-4907/12/11/1479)

## Supplementary materials

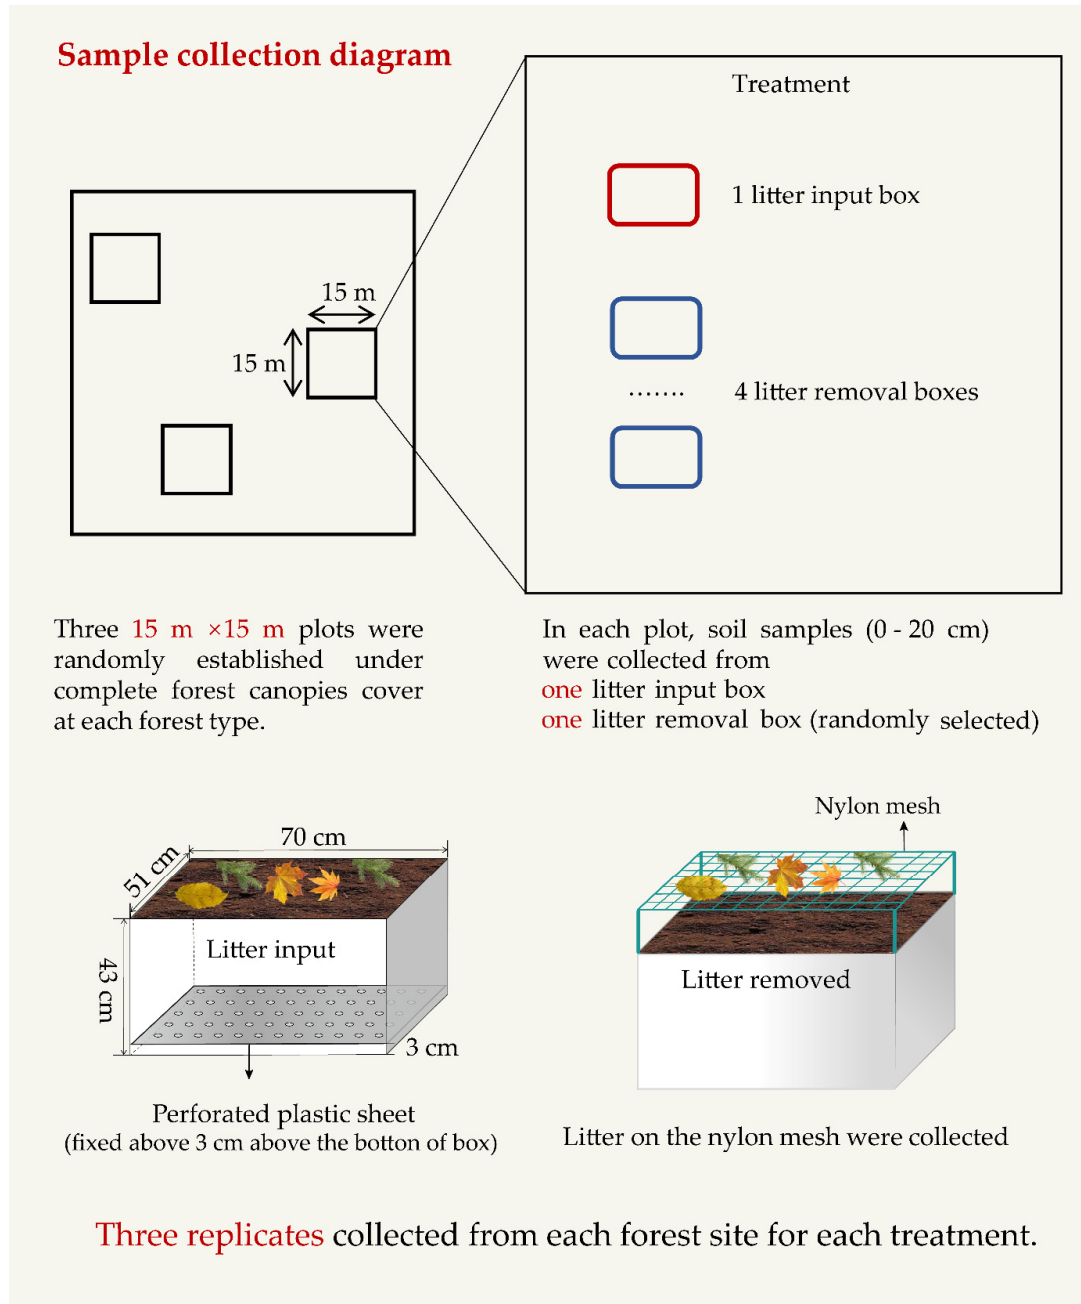

**Figure S1.** Sample collection diagram.

Supplement: s1 [file s1]
